# Supplementary material
Source: publisher site journal article supplement (https://www.dovepress.com/article/309844)
Supplement: Supplementary file 1 [file get_supplementary_file.php]

**S1. Sputum sampling and processing.**

Sputum induction was preceded by inhalation of 400 µg of salbutamol and spirometry. After the postbronchodilator spirometry, the patients inhaled sterile hypertonic saline (NaCl) at increasing concentrations (3, 4 and 5% solutions) at room temperature via an ultrasonic nebulizer (ULTRA-NEB TM 2000, DeVilbiss, Port Washington, NY, USA). The nebulization was continued for at least 7 minutes and stopped if a ≥2 mL sputum sample of good quality was obtained. The induction was stopped after a decrease of FEV1 by at least 20% from baseline (postbronchodilator) FEV1 value. The sputum samples were processed and examined within 2 hours after induction, according to the European Respiratory Society (ERS) recommendations17. The collected sputum was separated from saliva, and plugs were weighted. A phosphate-buffered saline (PBS) containing 0.1% dithiotreitol (DTT, Sigma-Aldrich, St. Louis, MO, USA) was added in a volume equal to four times the weight of the sputum, and the mixture was shaken for 15 minutes. Subsequently, a double volume of PBS was added, and the mixture was vortexed briefly. After filtration through nylon cell strainer (Thermo Fisher Scientific, Waltham, MA, USA), the cells were stained for viability assessment and for total cell count (mixing 10 μL trypan blue with an equal volume of cell suspension). The percentage of dead cells and epithelial cells were assessed manually using a Neubauer haemocytometer counting chamber. The total cell count, except that of squamous cells, was normalized for weight and expressed as cells 106/ g wet weight of sputum.To separate cells and supernatant, the sputum was centrifuged for 10 minutes at 469 x *g*. The supernatants were stored at −80°C for further investigation. The differential cell count (the percentage of eosinophils, neutrophils, macrophages, lymphocytes) was determined in May-Grünwald-Giemsa-stained smears based on the morphology of 300 cells from various fields.

Sputum eosinophilia was classified as ≥3% of all non-epithelial cells, and sputum neutrophilia was defined as ≥60% of all non-epithelial cells.

Figure E1. Receiver operating characteristic curve analysis of combined features from logistic regression model.


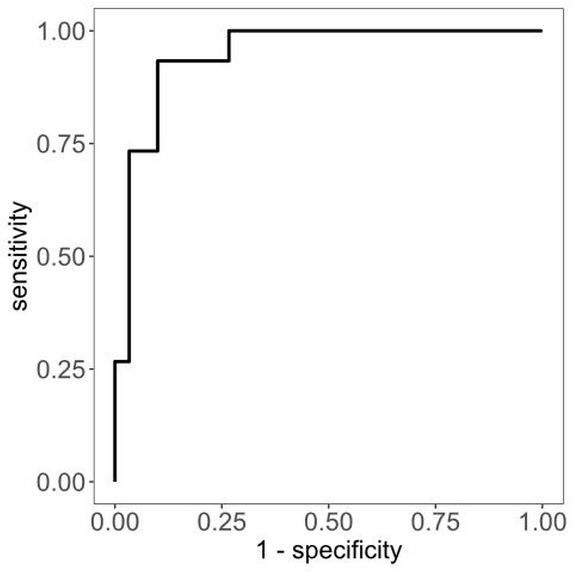


Table E1. Limit of detection of measured sputum cytokines in asthma and COPD patients.

| Cytokine | Assay | Limit of detection, pg/mL or ng/mL^ |
| --- | --- | --- |
| IL-1β | Bio-Plex Pro™ Human Cytokine 27-plex Assay | 0.6 |
| IL-1RA | Bio-Plex Pro™ Human Cytokine 27-plex Assay | 5.5 |
| IL-2* | Bio-Plex Pro™ Human Cytokine 27-plex Assay | 1.6 |
| IL-4* | Bio-Plex Pro™ Human Cytokine 27-plex Assay | 0.7 |
| IL-5* | Bio-Plex Pro™ Human Cytokine 27-plex Assay | 0.6 |
| IL-6 | Bio-Plex Pro™ Human Cytokine 27-plex Assay | 2.6 |
| IL-7 | Bio-Plex Pro™ Human Cytokine 27-plex Assay | 1.1 |
| IL-8 | Bio-Plex Pro™ Human Cytokine 27-plex Assay | 1.0 |
| IL-9* | Bio-Plex Pro™ Human Cytokine 27-plex Assay | 2.5 |
| IL-10* | Bio-Plex Pro™ Human Cytokine 27-plex Assay | 0.3 |
| IL-12* | Bio-Plex Pro™ Human Cytokine 27-plex Assay | 3.5 |
| IL-13* | Bio-Plex Pro™ Human Cytokine 27-plex Assay | 0.7 |
| IL-15* | Bio-Plex Pro™ Human Cytokine 27-plex Assay | 2.4 |
| IL-17* | Bio-Plex Pro™ Human Cytokine 27-plex Assay | 3.3 |
| FGF2 | Bio-Plex Pro™ Human Cytokine 27-plex Assay | 1.9 |
| G-CSF | Bio-Plex Pro™ Human Cytokine 27-plex Assay | 1.7 |
| GM-CSF* | Bio-Plex Pro™ Human Cytokine 27-plex Assay | 2.2 |
| IFNγ* | Bio-Plex Pro™ Human Cytokine 27-plex Assay | 6.4 |
| CXCL10 (IP10) | Bio-Plex Pro™ Human Cytokine 27-plex Assay | 6.1 |
| CCL2 (MCP-1) | Bio-Plex Pro™ Human Cytokine 27-plex Assay | 1.1 |
| CCL3 (MIP-1α)* | Bio-Plex Pro™ Human Cytokine 27-plex Assay | 1.6 |
| CCL4 (MIP-1β) | Bio-Plex Pro™ Human Cytokine 27-plex Assay | 2.4 |
| PDGF-BB* | Bio-Plex Pro™ Human Cytokine 27-plex Assay | 2.9 |
| CCL5 (RANTES)* | Bio-Plex Pro™ Human Cytokine 27-plex Assay | 1.8 |
| TNFα | Bio-Plex Pro™ Human Cytokine 27-plex Assay | 6.0 |
| VEGF* | Bio-Plex Pro™ Human Cytokine 27-plex Assay | 3.1 |
| CCL11* | ELISA (Biotechne, R&D Systems) | 5 |
| CCL24 | ELISA (Biotechne, R&D Systems) | 2.5 |
| CCL26 | ELISA (Biotechne, R&D Systems) | 2.33 |
| IL-3 | ELISA (Biotechne, R&D Systems) | 7.4 |
| IL-33 | ELISA (Biotechne, R&D Systems) | 0.519 |
| NE | ELISA (Demeditec Diagnostics) | 0.2^ |
| Periostin* | ELISA (Biomedica Medizinprodukte) | 1.8^ |
| MMP9 | ELISA (Biotechne, R&D Systems) | 0.156^ |
| TSLP | ELISA (Biotechne, R&D Systems) | 3.46 |

* Undetectable for more than 60% of the patients and not analysed further.

Table E2. Correlations between clinical and biochemical features evaluated in asthma and COPD.

|  | CCL24 | CCL26 | IL-3 | IL-33 | NE | MMP9 | TSLP | IL-1β | IL-1RA | IL-6 | IL-7 | IL-8 | FGF-β | G-CSF | CXCL10 | CCL2 | CCL4 | TNF-α | FEV1* | PY** | IgE | Neu^ | Eos & |
| --- | --- | --- | --- | --- | --- | --- | --- | --- | --- | --- | --- | --- | --- | --- | --- | --- | --- | --- | --- | --- | --- | --- | --- |
| CCL24 | 1.000 | 0.126 | -0.268 | 0.474 | 0.373 | 0.392 | 0.501 | 0.078 | -0.183 | 0.574 | 0.387 | 0.351 | 0.159 | 0.549 | 0.486 | 0.524 | 0.490 | 0.437 | -0.196 | 0.021 | 0.255 | 0.237 | -0.053 |
| CCL26 | 0.126 | 1.000 | -0.078 | 0.174 | 0.199 | 0.085 | -0.143 | 0.168 | 0.074 | 0.248 | 0.146 | 0.261 | -0.139 | 0.112 | 0.173 | 0.100 | 0.251 | 0.055 | -0.192 | -0.026 | -0.212 | -0.184 | 0.167 |
| IL-3 | -0.268 | -0.078 | 1.000 | -0.174 | 0.063 | -0.119 | -0.075 | -0.089 | 0.002 | -0.280 | -0.165 | -0.259 | -0.119 | -0.244 | -0.168 | -0.102 | -0.222 | -0.228 | -0.214 | 0.121 | -0.198 | -0.101 | 0.077 |
| IL-33 | 0.474 | 0.174 | -0.174 | 1.000 | 0.417 | 0.424 | 0.627 | 0.364 | 0.290 | 0.431 | 0.519 | 0.564 | 0.309 | 0.606 | 0.635 | 0.518 | 0.544 | 0.675 | -0.047 | -0.040 | 0.264 | 0.163 | 0.051 |
| NE | 0.373 | 0.199 | 0.063 | 0.417 | 1.000 | 0.699 | 0.082 | 0.374 | 0.194 | 0.509 | 0.420 | 0.497 | 0.194 | 0.526 | 0.418 | 0.466 | 0.475 | 0.527 | -0.213 | 0.221 | 0.095 | 0.235 | 0.066 |
| MMP9 | 0.392 | 0.085 | -0.119 | 0.424 | 0.699 | 1.000 | 0.165 | 0.469 | 0.296 | 0.661 | 0.543 | 0.668 | 0.298 | 0.699 | 0.460 | 0.565 | 0.573 | 0.630 | -0.173 | 0.261 | 0.208 | 0.420 | 0.020 |
| TSLP | 0.501 | -0.143 | -0.075 | 0.627 | 0.082 | 0.165 | 1.000 | 0.142 | -0.121 | 0.247 | 0.153 | 0.224 | 0.124 | 0.279 | 0.467 | 0.321 | 0.357 | 0.375 | 0.085 | -0.136 | 0.246 | 0.276 | -0.101 |
| IL-1β | 0.078 | 0.168 | -0.089 | 0.364 | 0.374 | 0.469 | 0.142 | 1.000 | 0.547 | 0.290 | 0.522 | 0.623 | 0.457 | 0.560 | 0.394 | 0.342 | 0.372 | 0.507 | 0.090 | 0.036 | -0.095 | 0.123 | -0.024 |
| IL-1RA | -0.183 | 0.074 | 0.002 | 0.290 | 0.194 | 0.296 | -0.121 | 0.547 | 1.000 | 0.149 | 0.553 | 0.497 | 0.437 | 0.469 | 0.271 | 0.371 | 0.140 | 0.326 | 0.020 | 0.094 | 0.035 | 0.149 | -0.065 |
| IL-6 | 0.574 | 0.248 | -0.280 | 0.431 | 0.509 | 0.661 | 0.247 | 0.290 | 0.149 | 1.000 | 0.596 | 0.758 | 0.153 | 0.723 | 0.496 | 0.585 | 0.703 | 0.602 | -0.485 | 0.420 | 0.094 | 0.356 | -0.126 |
| IL-7 | 0.387 | 0.146 | -0.165 | 0.519 | 0.420 | 0.543 | 0.153 | 0.522 | 0.553 | 0.596 | 1.000 | 0.687 | 0.551 | 0.718 | 0.645 | 0.676 | 0.504 | 0.650 | -0.220 | 0.235 | 0.050 | 0.270 | -0.129 |
| IL-8 | 0.351 | 0.261 | -0.259 | 0.564 | 0.497 | 0.668 | 0.224 | 0.623 | 0.497 | 0.758 | 0.687 | 1.000 | 0.294 | 0.782 | 0.523 | 0.603 | 0.798 | 0.774 | -0.352 | 0.381 | 0.059 | 0.397 | -0.024 |
| FGF-β | 0.159 | -0.139 | -0.119 | 0.309 | 0.194 | 0.298 | 0.124 | 0.457 | 0.437 | 0.153 | 0.551 | 0.294 | 1.000 | 0.508 | 0.381 | 0.515 | 0.253 | 0.512 | 0.162 | 0.052 | 0.088 | 0.255 | -0.096 |
| G-CSF | 0.549 | 0.112 | -0.244 | 0.606 | 0.526 | 0.699 | 0.279 | 0.560 | 0.469 | 0.723 | 0.718 | 0.782 | 0.508 | 1.000 | 0.630 | 0.750 | 0.668 | 0.796 | -0.195 | 0.219 | 0.070 | 0.428 | -0.187 |
| CXCL10 | 0.486 | 0.173 | -0.168 | 0.635 | 0.418 | 0.460 | 0.467 | 0.394 | 0.271 | 0.496 | 0.645 | 0.523 | 0.381 | 0.630 | 1.000 | 0.845 | 0.502 | 0.561 | -0.026 | 0.076 | -0.051 | 0.336 | -0.104 |
| CCL2 | 0.524 | 0.100 | -0.102 | 0.518 | 0.466 | 0.565 | 0.321 | 0.342 | 0.371 | 0.585 | 0.676 | 0.603 | 0.515 | 0.750 | 0.845 | 1.000 | 0.558 | 0.611 | -0.216 | 0.261 | 0.025 | 0.460 | -0.169 |
| CCL4 | 0.490 | 0.251 | -0.222 | 0.544 | 0.475 | 0.573 | 0.357 | 0.372 | 0.140 | 0.703 | 0.504 | 0.798 | 0.253 | 0.668 | 0.502 | 0.558 | 1.000 | 0.749 | -0.366 | 0.292 | 0.092 | 0.432 | 0.104 |
| TNF-α | 0.437 | 0.055 | -0.228 | 0.675 | 0.527 | 0.630 | 0.375 | 0.507 | 0.326 | 0.602 | 0.650 | 0.774 | 0.512 | 0.796 | 0.561 | 0.611 | 0.749 | 1.000 | -0.172 | 0.138 | 0.286 | 0.456 | -0.006 |
| FEV1* | -0.196 | -0.192 | -0.214 | -0.047 | -0.213 | -0.173 | 0.085 | 0.090 | 0.020 | -0.485 | -0.220 | -0.352 | 0.162 | -0.195 | -0.026 | -0.216 | -0.366 | -0.172 | 1.000 | -0.701 | 0.089 | -0.270 | 0.187 |
| PY** | 0.021 | -0.026 | 0.121 | -0.040 | 0.221 | 0.261 | -0.136 | 0.036 | 0.094 | 0.420 | 0.235 | 0.381 | 0.052 | 0.219 | 0.076 | 0.261 | 0.292 | 0.138 | -0.701 | 1.000 | -0.362 | 0.295 | -0.317 |
| IgE | 0.255 | -0.212 | -0.198 | 0.264 | 0.095 | 0.208 | 0.246 | -0.095 | 0.035 | 0.094 | 0.050 | 0.059 | 0.088 | 0.070 | -0.051 | 0.025 | 0.092 | 0.286 | 0.089 | -0.362 | 1.000 | 0.093 | 0.282 |
| Neu ^ | 0.237 | -0.184 | -0.101 | 0.163 | 0.235 | 0.420 | 0.276 | 0.123 | 0.149 | 0.356 | 0.270 | 0.397 | 0.255 | 0.428 | 0.336 | 0.460 | 0.432 | 0.456 | -0.270 | 0.295 | 0.093 | 1.000 | -0.468 |
| Eos& | -0.053 | 0.167 | 0.077 | 0.051 | 0.066 | 0.020 | -0.101 | -0.024 | -0.065 | -0.126 | -0.129 | -0.024 | -0.096 | -0.187 | -0.104 | -0.169 | 0.104 | -0.006 | 0.187 | -0.317 | 0.282 | -0.468 | 1.000 |

* FEV1/VC ratio pre-BD (%) ** pack-years ^ sputum neutrophils & sputum eosinophils

Table E3. The validation of logistic regression model of biochemical and clinical features for discrimination of asthma and CODP patients used in the study. The identified variables in model were as follows: sputum IL-6, IL-8, CCL4, neutrophils (%), and FEV1/VC ratio pre-BD (%).

| Patient no | Predicted probability | Predicted coefficient | Predicted class |
| --- | --- | --- | --- |
| 1 | 0.999 | 7.306 | 1 |
| 2 | 0.606 | 0.431 | 1 |
| 3 | 0.614 | 0.463 | 1 |
| 4 | 0.994 | 5.084 | 1 |
| 5 | 0.928 | 2.552 | 1 |
| 6 | 0.731 | 1.000 | 1 |
| 7 | 0.979 | 3.845 | 1 |
| 8 | 0.703 | 0.864 | 1 |
| 9 | 0.902 | 2.219 | 1 |
| 10 | 0.995 | 5.273 | 1 |

Predicted class: 1-COPD, 0-non-COPD
